# Supplementary material for: New insights into the radial structural differences of polyacrylonitrile fibres during thermal stabilization by the synchronous processing adjustment of time and temperature
Source: Royal Society of Chemistry journal article supplement (doi:10.1039/d2ra01786e), 2022-01-01
Supplement: d2ra01786e1.pdf [file d2ra01786e1.pdf]

## Supplementary Information

# **New insights into radial structural differences of polyacrylonitrile fibres during thermal stabilization by the synchronous processing adjustment of time and temperature**

*Liang Chen*<sup>a, c, 1</sup>, *Jing Chen*<sup>a, 1</sup>, *Zhigang Shen*<sup>c, \*\*</sup>, *Jie Liu*<sup>a, b</sup>, *Xiaoxu Wang*<sup>a, b, \*</sup>

*a Key Laboratory of Carbon Fiber and Functional Polymers, Ministry of Education, Beijing University of Chemical Technology, Chao-Yang District, Beijing 100029, China*

*b Changzhou Institute of Advanced Materials, Beijing University of Chemical Technology, Changzhou, Jiangsu 213164, China.*

*c Shanghai Research Institute of Petrochemical Technology, Pudong New District, Shanghai, 201211, China.*

*1 Both authors equally contributed to this work.*

Correspondence to:

\*: *Xiaoxu Wang* (E-mail: [wangxiaoxu@mail.buct.edu.cn](mailto:wangxiaoxu@mail.buct.edu.cn))

\*\* : *Zhigang Shen* (E-mail: [shenzg.sshy@sinopec.com](mailto:shenzg.sshy@sinopec.com))

### 3. Results and discussions

#### 3.1 Methodology

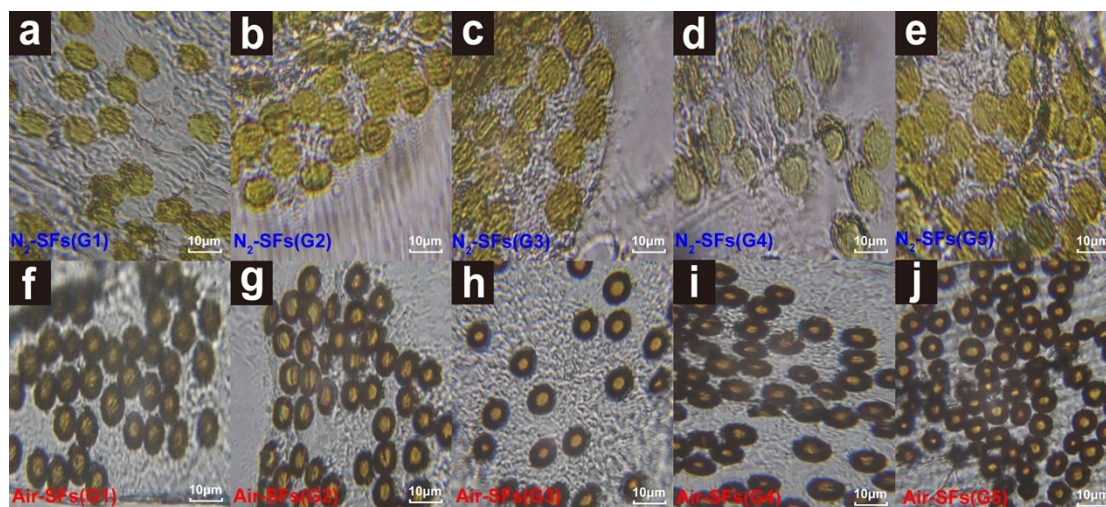

**Fig. S1** Optical images of the fibers' cross sections of Air-SFs and  $N_2$ -SFs obtained by several TTI adjustments, including (a) Air-SFs(G1), (b) Air-SFs(G2), (c) Air-SFs(G3), (d) Air-SFs(G4), and (e) Air-SFs(G5); (f)  $N_2$ -SFs(G1), (g)  $N_2$ -SFs(G2), (h)  $N_2$ -SFs(G3), (i)  $N_2$ -SFs(G4), and (j)  $N_2$ -SFs(G5).

**Table S1** The detailed results of relative element contents, including C, N, and O, of the linear testing points of Air-SFs(G3) and  $N_2$ -SFs(G3). All the results below are recorded by SEM-EDS test.

|                                 | Testing points code | Air-SFs          |       |       | $N_2$ -SFs       |       |      |
|---------------------------------|---------------------|------------------|-------|-------|------------------|-------|------|
|                                 |                     | C                | N     | O     | C                | N     | O    |
| Relative element contents (wt%) | 1                   | 72.19            | 17.97 | 9.84  | 74.12            | 19.93 | 5.95 |
|                                 | 2                   | 65.30            | 28.78 | 5.92  | 72.73            | 21.54 | 5.73 |
|                                 | 3                   | 65.21            | 28.82 | 5.97  | 71.43            | 22.58 | 5.99 |
|                                 | 4                   | 64.28            | 29.65 | 6.07  | 68.62            | 25.57 | 5.81 |
|                                 | 5                   | 61.98            | 27.96 | 10.06 | 73.60            | 20.33 | 6.07 |
|                                 | /                   | 100 wt% in total |       |       | 100 wt% in total |       |      |

## Air-SFs(G3)

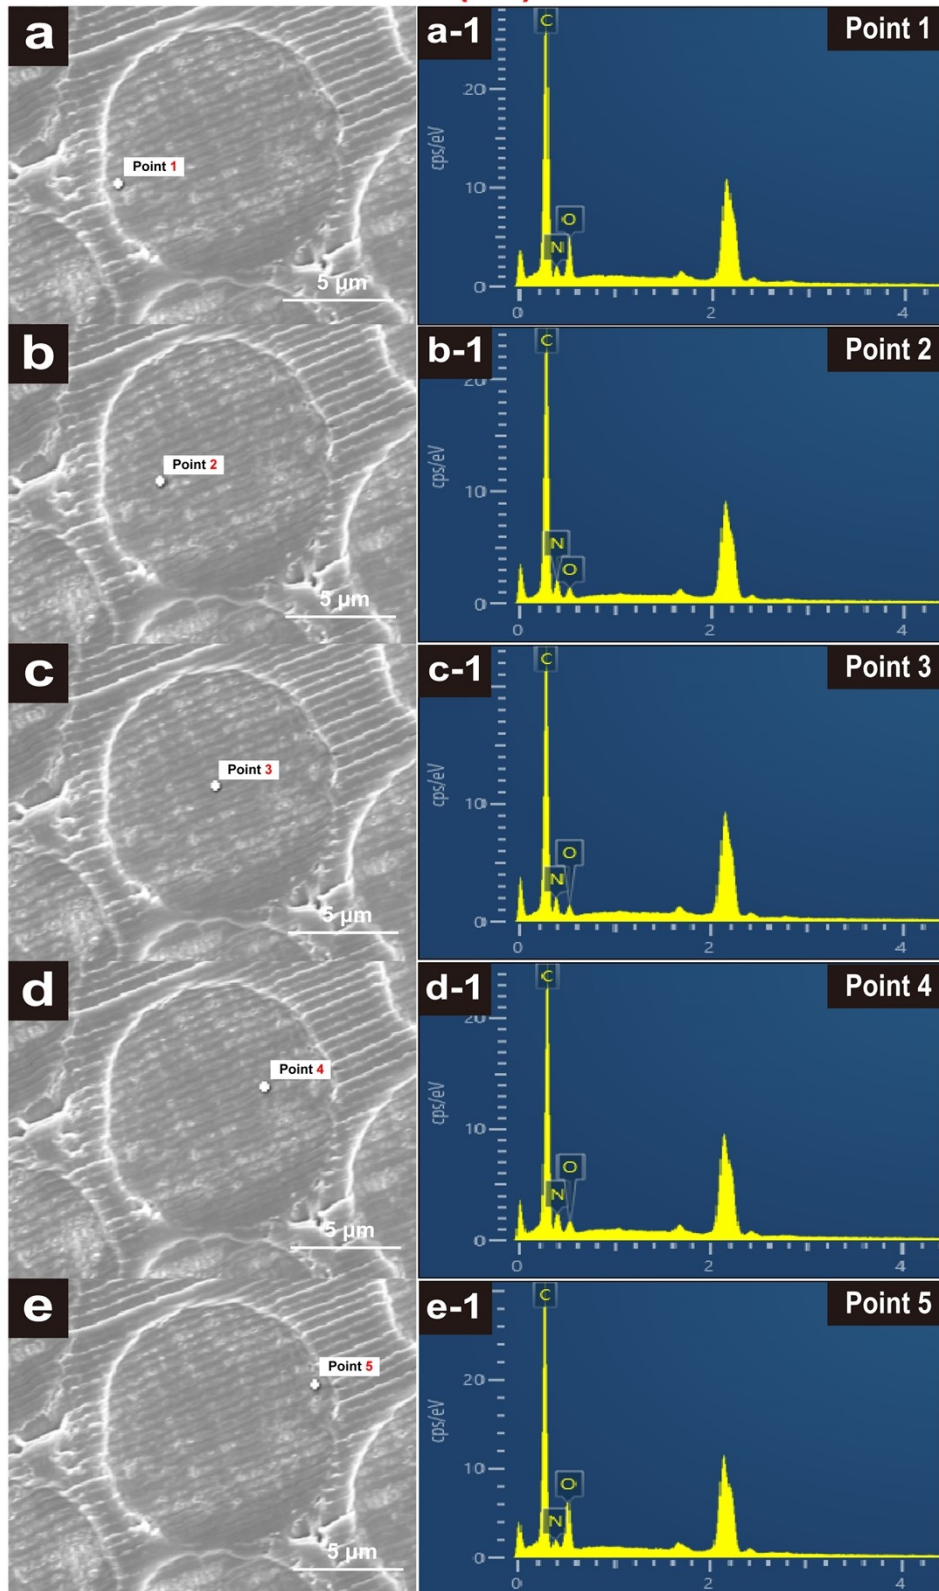

**Fig. S2** SEM images and energy dispersive spectra of Air-SFs during several TTI adjustments, including (a) Air-SFs(G1), (b) Air-SFs(G2), (c) Air-SFs(G3), (d) Air-SFs(G4), and (e) Air-SFs(G5).

### $N_2$ -SFs(G3)

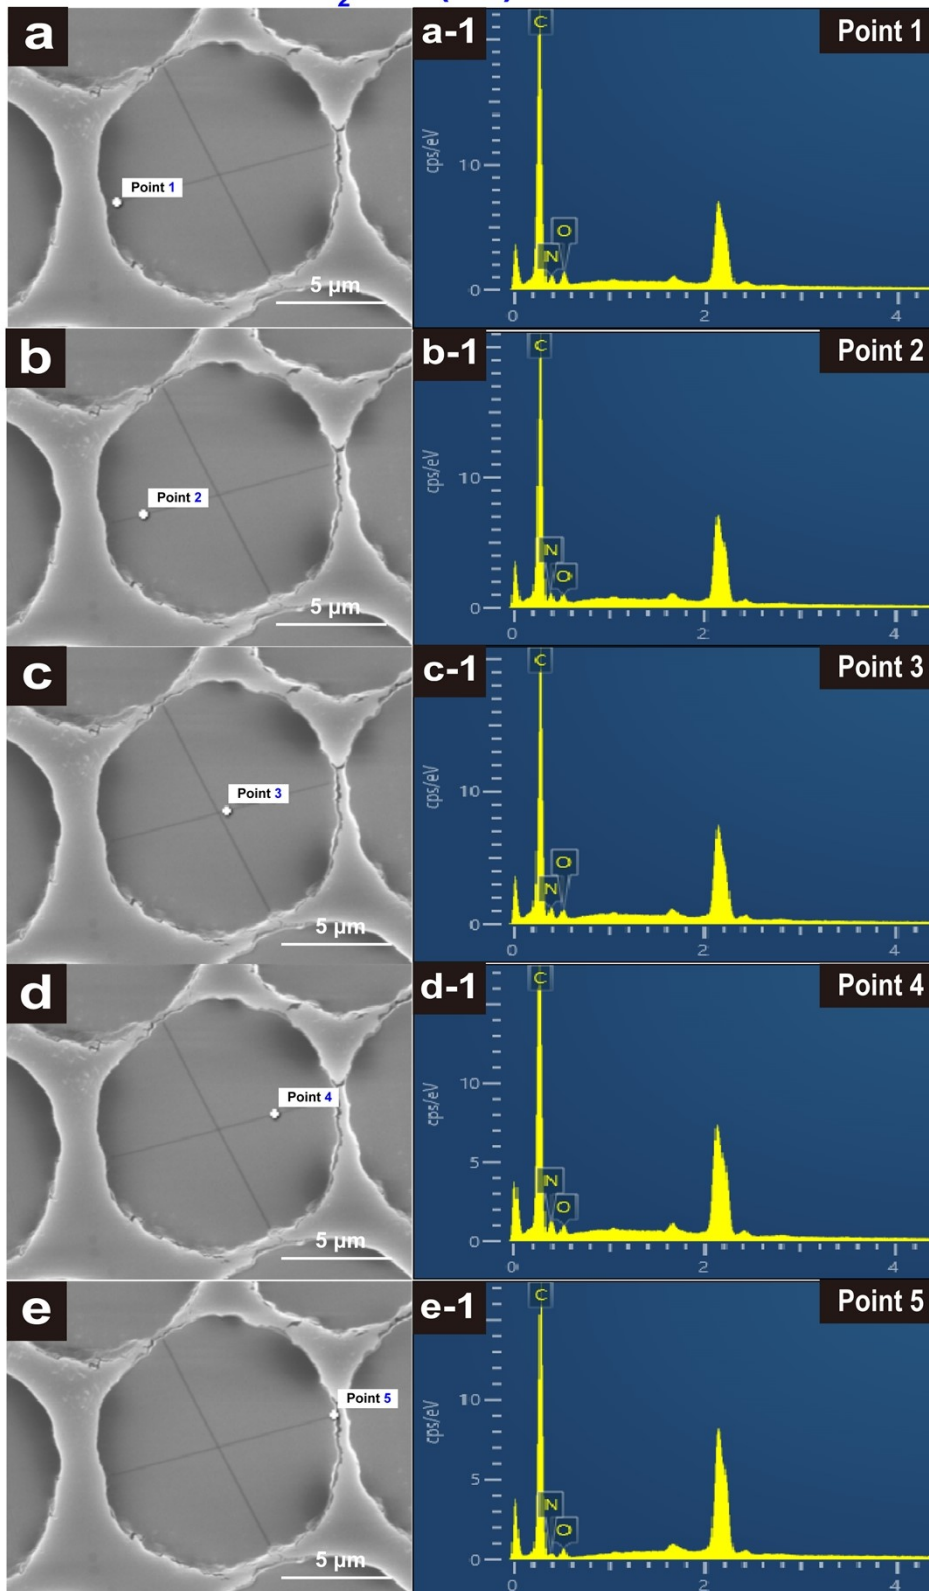

**Fig. S3** SEM images and energy dispersive spectra of  $N_2$ -SFs during several TTI adjustments, including (a)  $N_2$ -SFs(G1), (b)  $N_2$ -SFs(G2), (c)  $N_2$ -SFs(G3), (d)  $N_2$ -SFs(G4), and (e)  $N_2$ -SFs(G5).



### 3.2 The integrating effects of time/temperature on the stabilization/aggregation structures parameters both in the skin and core regions of stabilized PAN fibers

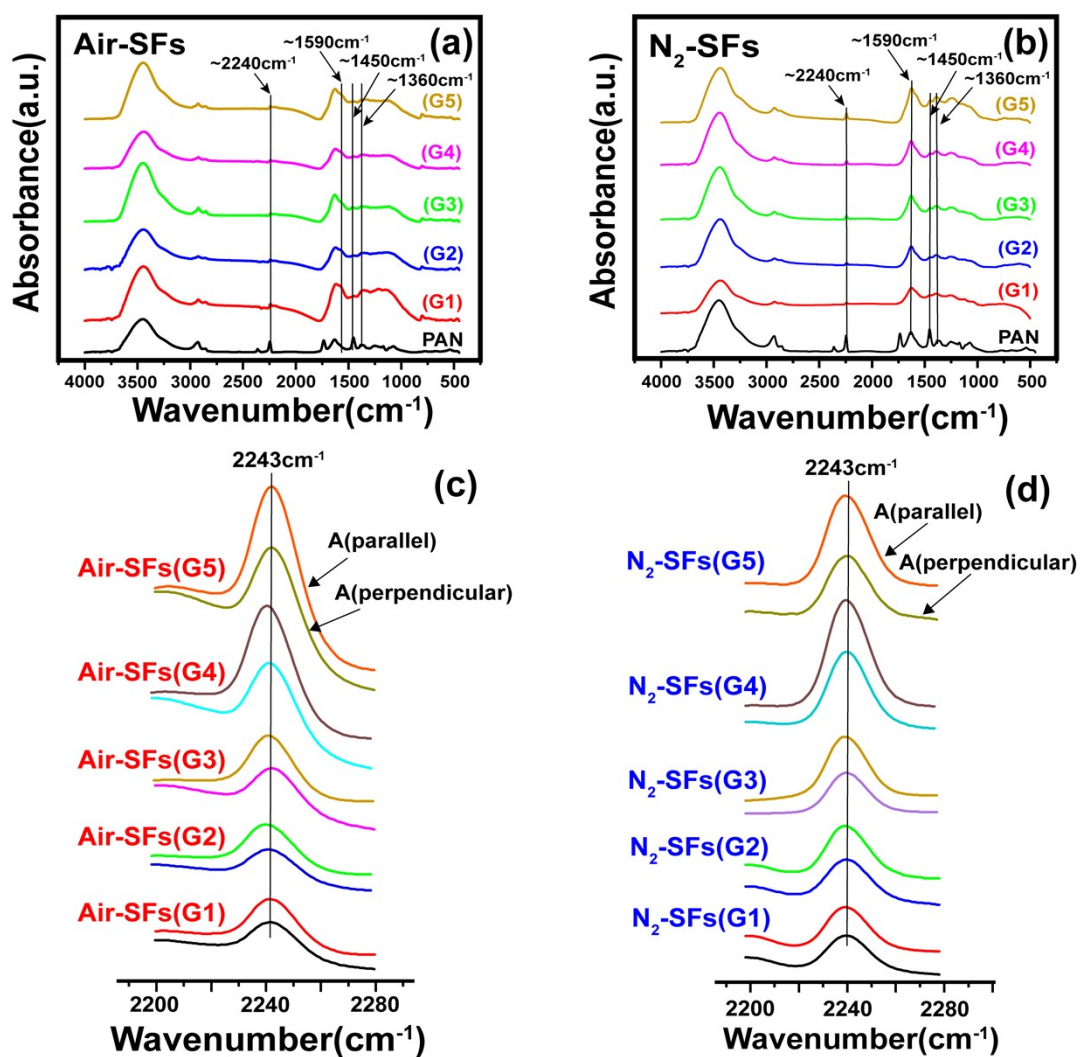

**Fig. S4** FTIR spectra of several stabilized PAN fibers, (a) Air-SFs from G1 to G5, (b)  $N_2$ -SFs from G1 to G5; (c) polarized FTIR spectra obtained by parallel and perpendicular directions for each stabilized PAN fibers sample, (c) Air-SFs from G1 to G5, (d)  $N_2$ -SFs from G1 to G5.

**Table S2** Detailed orientation degrees of PAN chains both in skin and core regions of Air-SFs samples. The values of ' $FNs_{core}$ ' and ' $DHI_{core}$ ' are obtain by measuring overall fraction of reacted nitrile groups and the orientation degree in quasicrystals of  $N_2$ -SFs, respectively.

| Name | $FNs$ (%) | $FNs_{skin}$<br>(%) | $FNs_{core}$<br>(%) | $DHI$<br>(%) | $DHI_{skin}$<br>(%) | $DHI_{core}$<br>(%) |
|------|-----------|---------------------|---------------------|--------------|---------------------|---------------------|
|------|-----------|---------------------|---------------------|--------------|---------------------|---------------------|

|              |       |       |       |        |        |        |
|--------------|-------|-------|-------|--------|--------|--------|
| PAN          | 11.50 | /     | /     | 0.5847 | /      | /      |
| Air-SFs (G1) | 82.86 | 84.82 | 75.40 | 5.7037 | 6.5627 | 2.4348 |
| Air-SFs (G2) | 80.65 | 82.24 | 73.82 | 3.9619 | 4.3415 | 2.3103 |
| Air-SFs (G3) | 77.53 | 79.01 | 70.56 | 1.3469 | 1.3002 | 1.5682 |
| Air-SFs (G4) | 79.54 | 81.45 | 70.32 | 2.8421 | 3.0629 | 1.4902 |
| Air-SFs (G5) | 81.33 | 83.92 | 68.73 | 3.1579 | 3.4188 | 1.4253 |

**Table S3** Evolutions of modified aggregation structures both in the skin and core regions of Air-SFs. The values of ' $L_c$ ', ' $\beta_{core}$ ', ' $L_{c, core}$ ' and ' $\beta_{c, core}$ ' are obtain by measuring overall crystalline size, crystallinity, crystalline size of  $N_2$ -SFs, and crystallinity of  $N_2$ -SFs, respectively.

| Name         | $\eta$ | $\beta$<br>(%) | $\beta_{core}$<br>(%) | $\beta_{skin}$<br>(%) | $L_c$ (nm) | $L_{c,core}$<br>(nm) | $L_{c,skin}$ (nm) |
|--------------|--------|----------------|-----------------------|-----------------------|------------|----------------------|-------------------|
| PAN          | 0      | 56.23          | /                     | /                     | 7.4473     | /                    | /                 |
| Air-SFs (G1) | 0.7923 | 17.98          | 34.21                 | 13.71                 | 1.3772     | 1.8269               | 1.2591            |
| Air-SFs (G2) | 0.8033 | 20.18          | 35.68                 | 16.61                 | 1.4694     | 2.0225               | 1.3422            |
| Air-SFs (G3) | 0.8252 | 23.21          | 44.29                 | 18.76                 | 1.5032     | 2.2176               | 1.3526            |
| Air-SFs (G4) | 0.8331 | 20.61          | 44.95                 | 16.63                 | 1.4808     | 2.2225               | 1.3596            |
| Air-SFs (G5) | 0.8420 | 19.17          | 45.32                 | 15.23                 | 1.4771     | 2.3181               | 1.3504            |

### 3.3 The integrating effects of time/temperature on the orientation of PAN chains

both in the skin and core regions of stabilized PAN fibers

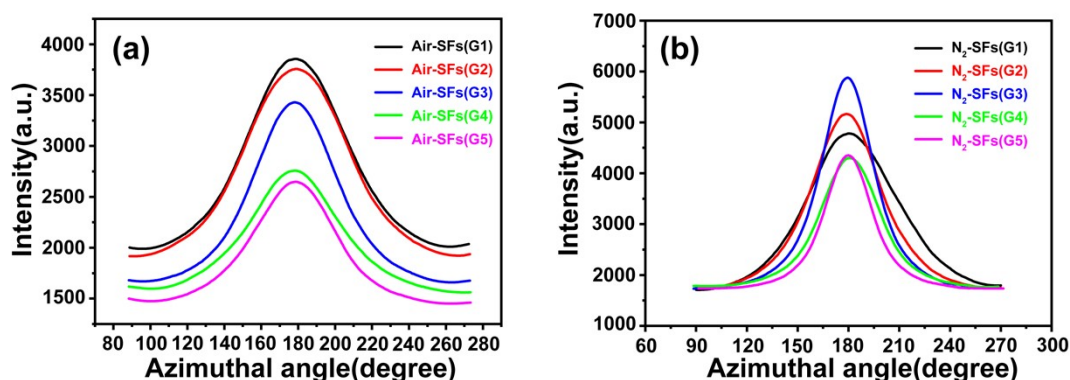

**Fig. S5** Azimuthal scans at  $2\theta=16.7^\circ$  of XRD pattern of stabilized PAN fibers sample with different TTIs. (a) Air-SFs from G1 to G5, and (b)  $N_2$ -SFs from G1 to G5. Where the  $N_2$ -SFs is considered as core structure of Air-SFs based on the mathematic model.

**Table S4** Detailed orientation degrees of PAN chains both in skin and core regions of Air-SFs samples. The values of ' $f_{core}$ ' and ' $f_{c,core}$ ' are obtain by measuring overall orientation degree and the

orientation degree in quasicrystals of N<sub>2</sub>-SFs, respectively.

| Name         | $f$    | $f_c$  | $f_a$  | $f_{core}$ | $f_{skin}$ | $f_{c,core}$ | $f_{c,skin}$ | $f_{a,core}$ | $f_{a,skin}$ |
|--------------|--------|--------|--------|------------|------------|--------------|--------------|--------------|--------------|
| PAN          | 0.5523 | 0.8291 | 0.2549 | /          | /          | /            | /            | /            | /            |
| Air-SFs (G1) | 0.3088 | 0.6467 | 0.2347 | 0.1993     | 0.3375     | 0.6557       | 0.6443       | 0.0287       | 0.2888       |
| Air-SFs (G2) | 0.3566 | 0.7119 | 0.2668 | 0.2276     | 0.3882     | 0.7347       | 0.7066       | 0.0301       | 0.3248       |
| Air-SFs (G3) | 0.3588 | 0.7327 | 0.2458 | 0.2919     | 0.3730     | 0.7861       | 0.7214       | 0.0254       | 0.2925       |
| Air-SFs (G4) | 0.4121 | 0.7248 | 0.3309 | 0.3521     | 0.4241     | 0.7775       | 0.7161       | 0.1565       | 0.3659       |
| Air-SFs (G5) | 0.4124 | 0.6959 | 0.3452 | 0.3809     | 0.4183     | 0.8145       | 0.6781       | 0.2041       | 0.3716       |

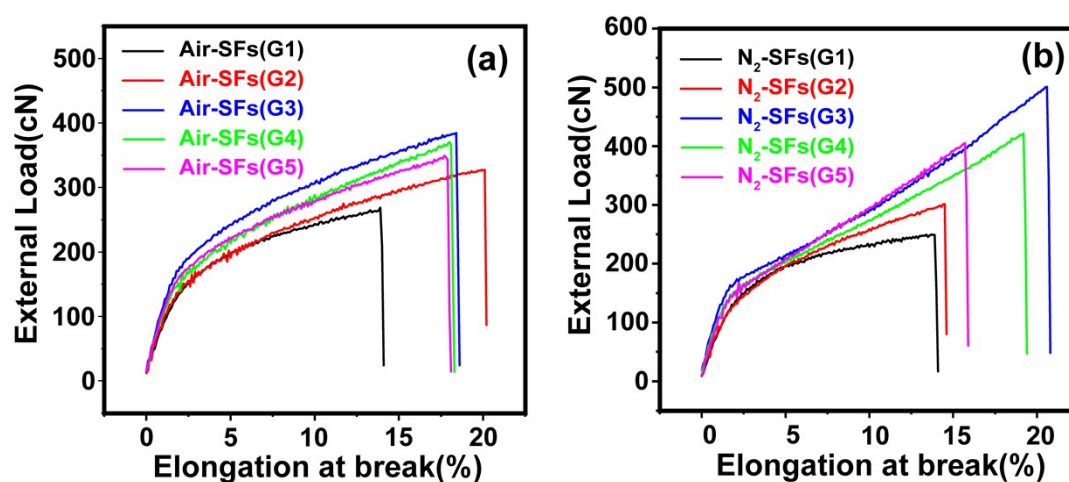

**Fig. S6** Stress-strain curves of (a)Air-SFs from G1 to G5, and (b)N<sub>2</sub>-SFs from G1 to G5.

**Table S5.** The details of mechanical properties of several stabilized PAN fibers, including that (a) Air- SFs from G1 to G5, and (b) N<sub>2</sub>-SFs from G1 to G5.

| Sample code              | T.S. (GPa) | CV (%) | T.M. (GPa) | CV (%) |
|--------------------------|------------|--------|------------|--------|
| Air-SFs (G1)             | 262.1      | 7.1    | 9236.6     | 20.6   |
| Air-SFs (G2)             | 330.5      | 8.2    | 10744.9    | 27.5   |
| Air-SFs (G3)             | 384.2      | 9.5    | 12280.2    | 26.7   |
| Air-SFs (G4)             | 368.4      | 9.8    | 12983.5    | 38.7   |
| Air-SFs (G5)             | 349.5      | 7.3    | 12903.1    | 31.8   |
| N <sub>2</sub> -SFs (G1) | 295.1      | 6.1    | 8257.9     | 16.3   |
| N <sub>2</sub> -SFs (G2) | 367.4      | 7.2    | 10436.7    | 23.4   |
| N <sub>2</sub> -SFs (G3) | 459.4      | 4.2    | 11393.1    | 31.4   |
| N <sub>2</sub> -SFs (G4) | 422.8      | 8.4    | 11956.3    | 33.6   |
| N <sub>2</sub> -SFs (G5) | 401.2      | 7.5    | 12724.7    | 34.8   |

### 3.4 The effects of the stabilized PAN fibers' structural differences on the resultant carbon fibers performances

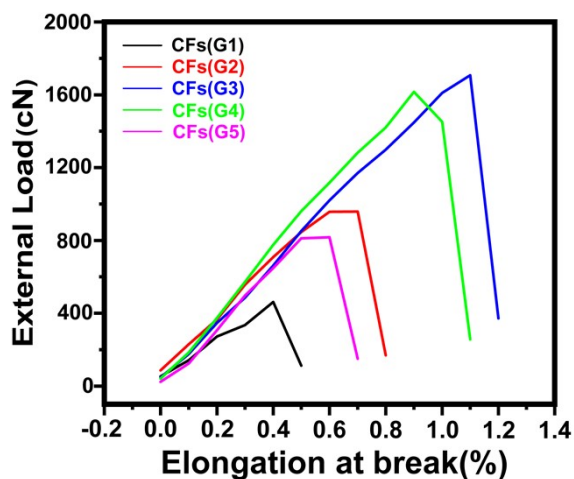

**Fig. S7** Stress-strain curves of the resultant CFs from G1 to G5.

**Table S6** Mechanical properties of the resultant carbon fibers from G1 to G5, including tensile strength, tensile modulus and elongation at break.

| Sample code | T.S. (MPa) | CV (%) | T.M. (GPa) | CV (%) | $\epsilon$ (%) | CV (%) |
|-------------|------------|--------|------------|--------|----------------|--------|
| CFs(G1)     | 530.7      | 5.8    | 128.9      | 20.4   | 0.6            | 8.4    |
| CFs(G2)     | 946.6      | 6.3    | 132.8      | 23.5   | 0.8            | 14.9   |
| CFs(G3)     | 1720.8     | 10.4   | 179.4      | 19.8   | 1.1            | 10.3   |
| CFs(G4)     | 1527.1     | 7.5    | 193.6      | 18.5   | 1.0            | 9.2    |
| CFs(G5)     | 1128.3     | 9.6    | 192.5      | 16.4   | 0.7            | 11.4   |

**Table S7** D/G ratio ( $I_D/I_G$ ) and graphite stack thickness ( $L_c$ ) of the resultant carbon fibers (CFs) from G1 to G5.

| Sample code | $I_D/I_G$ | $L_c$ (nm) |
|-------------|-----------|------------|
| CFs(G1)     | 0.9454    | 1.11       |
| CFs(G2)     | 0.9168    | 1.09       |
| CFs(G3)     | 0.8536    | 1.39       |
| CFs(G4)     | 0.8975    | 1.32       |
| CFs(G5)     | 0.9084    | 1.27       |



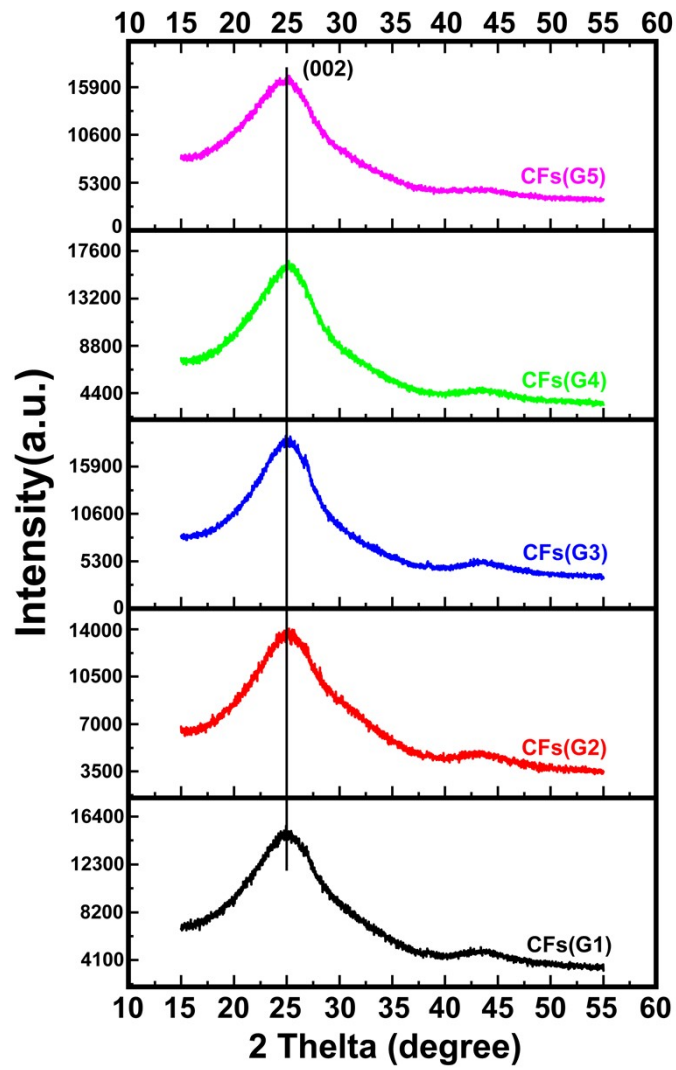

Fig. S8 Stack plot of XRD patterns of carbon fiber samples from G1 to G5.
